# Supplementary material for: Facile synthesis of C–Fe3O4–C core–shell nanotubes by a self-templating route and the application as a high-performance anode for Li-ion batteries
Source: Royal Society of Chemistry journal article supplement (doi:10.1039/c3ra22350g), 2013-01-01
Supplement: c3ra22350g.pdf [file c3ra22350g.pdf]

# Facile synthesis of C/Fe<sub>3</sub>O<sub>4</sub>/C core-shell nanotubes by a self-templating route and the application as high-performance anode for Li-ion batteries

Y. G. Zhu, J. Xie, G. S. Cao, \* T. J. Zhu and X. B. Zhao

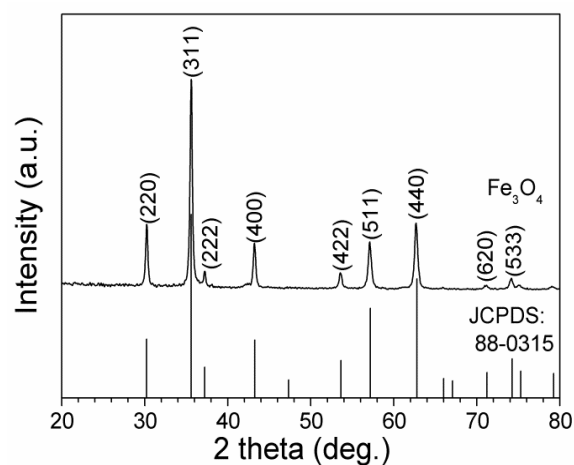

**Fig. S1** XRD patterns of bare Fe<sub>3</sub>O<sub>4</sub>

No obvious impurities are observed. The bare Fe<sub>3</sub>O<sub>4</sub> was reduced from Fe<sub>2</sub>O<sub>3</sub> under N<sub>2</sub>/H<sub>2</sub> mixed gas at 260 °C for 2 h.

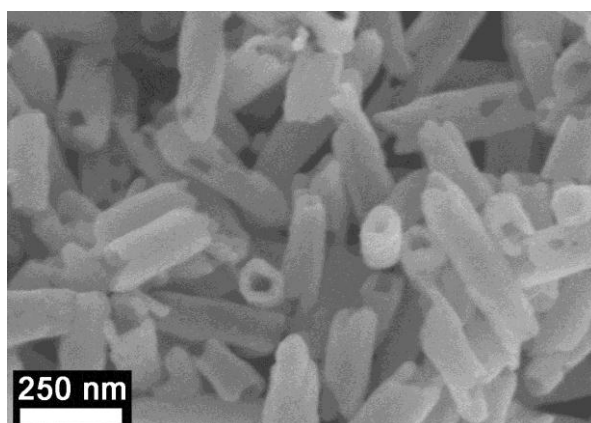

**Fig. S2** SEM image of bare Fe<sub>3</sub>O<sub>4</sub>

\*State Key Laboratory of Silicon Materials, Key Laboratory of Advanced Materials and Applications for Batteries of Zhejiang Province and Department of Materials Science and Engineering, Zhejiang University, Hangzhou, 310027, P. R. China. E-mail: gscao@zju.edu.cn; Fax: +86 571-87951451; Tel: +86 571-87951451

As shown in Fig. S2, the structure of bare  $\text{Fe}_3\text{O}_4$  is nanotube. However, some of the bare  $\text{Fe}_3\text{O}_4$  nanotubes have been broken during the heat treatment.
